# Supplementary material for: The Influence of Maternal Folate Status on Gestational Diabetes Mellitus: A Systematic Review and Meta-Analysis
Source: MDPI journal article supplement (doi:10.3390/nu15122766), 2023-06-16
Supplement: s1 [file s1]

## Supplemental tables

**Table S1:** Search terms.

|        | Subject headings                    | Free words                                                                                                                                                                                                                                                                                                                                                                          |
|--------|-------------------------------------|-------------------------------------------------------------------------------------------------------------------------------------------------------------------------------------------------------------------------------------------------------------------------------------------------------------------------------------------------------------------------------------|
| Pubmed | diabetes,gestational                | Diabetes, Pregnancy-Induced<br>Diabetes, Pregnancy Induced<br>Pregnancy-Induced Diabetes<br>Gestational Diabetes<br>Diabetes Mellitus, Gestational<br>Gestational Diabetes Mellitus                                                                                                                                                                                                 |
|        | folic acid                          | Vitamin M<br>Vitamin B9<br>B9, Vitamin<br>Pteroylglutamic Acid<br>Folic Acid, Monopotassium Salt<br>Folic Acid, Monosodium Salt<br>Folic Acid, Potassium Salt<br>Folic Acid, (DL)-Isomer<br>Folvite<br>Folacin<br>Folate<br>Folic Acid, (D)-Isomer<br>Folic Acid, Calcium Salt (1:1)<br>Folic Acid, Sodium Salt                                                                     |
| Embase | Pregnancy      diabetes<br>mellitus | diabetes mellitus gravidarum;<br>diabetes, gestational;<br>diabetes, pregnancy;<br>gestational diabetes;<br>gestational diabetes mellitus;<br>pregnancy diabetes;<br>pregnancy in diabetics                                                                                                                                                                                         |
|        | Folic acid                          | 2 [ [4 [ (2 amino 4 oxo 3h pteridin 6 yl)<br>methylamino] benzoyl] amino] pentanedioic<br>acid;<br>2 amino 6 [ [4 [ (1, 3 dicarboxypropyl)<br>aminocarbonyl] phenylamino] methyl] 4<br>pteridinol;<br>2 amino 6 [ [4 [ (1, 3 dicarboxypropyl)<br>carbamoyl] anilino] methyl] 4 pteridinol;<br>acfol;<br>acide folique ccd;<br>acido folico;<br>acifolic;<br>apo-folic;<br>filicine; |

|  |  |                                                                                                                                                                                                                                                                                                                                                                                                                                                                                                                                                                                                                                                                                                                                                                                                                                                                                                                                                                                     |
|--|--|-------------------------------------------------------------------------------------------------------------------------------------------------------------------------------------------------------------------------------------------------------------------------------------------------------------------------------------------------------------------------------------------------------------------------------------------------------------------------------------------------------------------------------------------------------------------------------------------------------------------------------------------------------------------------------------------------------------------------------------------------------------------------------------------------------------------------------------------------------------------------------------------------------------------------------------------------------------------------------------|
|  |  | <p> folacid;<br/> folacin;<br/> folart;<br/> folate;<br/> folate acid;<br/> folate sodium;<br/> folavit;<br/> foldine;<br/> foliamin;<br/> folic acid dha;<br/> folicet;<br/> folicid;<br/> folina;<br/> folinsyre;<br/> folitab;<br/> folium acid;<br/> folivit;<br/> folsan;<br/> folsav;<br/> folverlan;<br/> folvite;<br/> gravi-fol;<br/> ingafol;<br/> lactobacillus casei factor;<br/> lafol;<br/> lexpec;<br/> megafol;<br/> mission prenatal;<br/> n [4 [ [(2 amino 3, 4 dihydro 4 oxo 6 pteridiny) methyl] amino] benzoyl] glutamic acid;<br/> n [ [4 [ [(2 amino 4 oxo 1, 4 dihydro 6 pteridiny) methyl] amino] phenyl] carbonyl] glutamic acid;<br/> n [ [4 [ [(2 amino 4 oxo 1, 4 dihydropteridin 6 yl) methyl] amino] phenyl] carbonyl] glutamic acid;<br/> n [para [ (2 amino 4 hydroxy 6 pteridylmethyl) amino] benzoyl] glutamic acid;<br/> neocepri;<br/> nsc 3073;<br/> pteroylglutamic acid tablets;<br/> pteroyl glutamate;<br/> pteroyl l glutamic acid; </p> |
|--|--|-------------------------------------------------------------------------------------------------------------------------------------------------------------------------------------------------------------------------------------------------------------------------------------------------------------------------------------------------------------------------------------------------------------------------------------------------------------------------------------------------------------------------------------------------------------------------------------------------------------------------------------------------------------------------------------------------------------------------------------------------------------------------------------------------------------------------------------------------------------------------------------------------------------------------------------------------------------------------------------|

|          |                       |                                                                                                                                                                                                                                                                                                                              |
|----------|-----------------------|------------------------------------------------------------------------------------------------------------------------------------------------------------------------------------------------------------------------------------------------------------------------------------------------------------------------------|
|          |                       | pteroyl monoglutamate;<br>pteroylglutamate;<br>pteroylglutamic acid;<br>pteroylmonoglutamate;<br>pteroylmonoglutamic acid;<br>rubiefol;<br>sodium folate;<br>speciafoldine;<br>unifol (folic acid);<br>vifolin;<br>vitamin bc;<br>vitamin m                                                                                  |
| Cochrane | Diabetes, Gestational | Diabetes, Pregnancy-Induced;<br>Gestational Diabetes Mellitus;<br>Gestational Diabetes;<br>Diabetes Mellitus, Gestational;<br>Pregnancy-Induced Diabetes;<br>Diabetes, Pregnancy Induced                                                                                                                                     |
|          | Folic Acid            | Folic Acid, Potassium Salt;<br>Folate;<br>Folvite;<br>Folacin;<br>Folic Acid, Monosodium Salt;<br>Folic Acid, Calcium Salt (1:1);<br>Folic Acid, Sodium Salt;<br>Folic Acid, Monopotassium Salt;<br>Pteroylglutamic Acid;<br>Vitamin B9;<br>Vitamin M;<br>B9, Vitamin;<br>Folic Acid, (D)-Isomer;<br>Folic Acid, (DL)-Isomer |

**Table S2:** Pubmed search strategy.

((("Diabetes, Gestational"[Mesh]) OR ((((((Diabetes, Pregnancy-Induced) OR (Diabetes, Pregnancy Induced)) OR (Pregnancy-Induced Diabetes)) OR (Gestational Diabetes)) OR (Diabetes Mellitus, Gestational)) OR (Gestational Diabetes Mellitus))) AND (("Folic Acid"[Mesh]) OR (((((((((((((((Vitamin M) OR (Vitamin B9)) OR (B9, Vitamin)) OR (Pteroylglutamic Acid)) OR (Folic Acid, Monopotassium Salt)) OR (Folic Acid, Monosodium Salt)) OR (Folic Acid, Potassium Salt)) OR (Folic Acid, (DL)-Isomer)) OR (Folvite)) OR (Folacin)) OR (Folate)) OR (Folic Acid, (D)-Isomer)) OR (Folic Acid, Calcium Salt (1:1))) OR (Folic Acid, Sodium Salt)))

**Table S3:** Web of Science search strategy.

|                                                                                                                                                                                                                                                                                                                                                                                                                                                                                                                                                                                                                                                                                                                                                                                                                                                                                                                                                                                                                                  |  |
|----------------------------------------------------------------------------------------------------------------------------------------------------------------------------------------------------------------------------------------------------------------------------------------------------------------------------------------------------------------------------------------------------------------------------------------------------------------------------------------------------------------------------------------------------------------------------------------------------------------------------------------------------------------------------------------------------------------------------------------------------------------------------------------------------------------------------------------------------------------------------------------------------------------------------------------------------------------------------------------------------------------------------------|--|
| <p># Web of Science Search Strategy (v0.1)</p> <p># Databases: All databases</p> <p># Permissions:</p> <ul style="list-style-type: none"> <li>- WOS: 1985 to 2022</li> <li>- CSCD: 2020 to 2022</li> <li>- DIIDW: 1966 to 2022</li> <li>- KJD: 1980 to 2022</li> <li>- SCIELO: 2002 to 2022</li> </ul>                                                                                                                                                                                                                                                                                                                                                                                                                                                                                                                                                                                                                                                                                                                           |  |
| <p># Search.</p> <p>1: ((((((TS=(diabetes,gestational)) OR TS=(Diabetes, Pregnancy-Induced )) OR TS=(Diabetes, Pregnancy Induced)) OR TS=(Pregnancy-Induced Diabetes)) OR TS=(Gestational Diabetes)) OR TS=(Diabetes Mellitus, Gestational)) OR TS=(Gestational Diabetes Mellitus) Date of operation: Tue Oct 18 2022 20:17:27 GMT+0800 (China Standard Time) Search results: 32950</p> <p>2: (((((((((((TS=(folic acid)) OR TS=(Vitamin M)) OR TS=(Vitamin B9)) OR TS=(B9, Vitamin)) OR TS=(Pteroylglutamic Acid)) OR TS=(Folic Acid, Monopotassium Salt)) OR TS=(Folic Acid, Monosodium Salt)) OR TS=(Folic Acid, Potassium Salt)) OR TS=(Folic Acid, (DL)-Isomer)) OR TS=(Folvite)) OR TS=(Folacin)) OR TS=(Folate)) OR TS=(Folic Acid, (D)-Isomer)) OR TS=(Folic Acid, Calcium Salt (1:1)) OR TS=(Folic Acid, Sodium Salt) Date of operation: Tue Oct 18 2022 20:21:41 GMT+0800 (China Standard Time) Search results: 93182</p> <p>3: #2 AND #1 Running date: Tue Oct 18 2022 20:22:12 GMT+0800 (CST) Search result: 422</p> |  |

**Table S4:** Cochrane search strategy.

|                               |                                                                                 |       |
|-------------------------------|---------------------------------------------------------------------------------|-------|
| Search Name:                  |                                                                                 |       |
| Date Run: 16/10/2022 08:25:43 |                                                                                 |       |
| Comment:                      |                                                                                 |       |
| ID                            | Search                                                                          | Hits  |
| #1                            | MeSH descriptor: [Diabetes, Gestational] explode all trees                      | 1165  |
| #2                            | Diabetes, Pregnancy-Induced                                                     | 254   |
| #3                            | Gestational Diabetes Mellitus                                                   | 3047  |
| #4                            | Gestational Diabetes                                                            | 4125  |
| #5                            | Diabetes Mellitus, Gestational                                                  | 3047  |
| #6                            | Pregnancy-Induced Diabetes                                                      | 254   |
| #7                            | Diabetes, Pregnancy Induced                                                     | 588   |
| #8                            | #1 or #2 or #3 or #4 or #5 or #6 or #7                                          | 4400  |
| #9                            | MeSH descriptor: [Folic Acid] explode all trees                                 | 3764  |
| #10                           | Folic Acid, Potassium Salt                                                      | 21    |
| #11                           | Folate                                                                          | 2671  |
| #12                           | Folvite                                                                         | 10    |
| #13                           | Folacin                                                                         | 23    |
| #14                           | Folic Acid, Monosodium Salt                                                     | 4     |
| #15                           | Folic Acid, Sodium Salt                                                         | 35    |
| #16                           | Folic Acid, Monopotassium Salt                                                  | 1     |
| #17                           | Pteroylglutamic Acid                                                            | 18    |
| #18                           | Vitamin B9                                                                      | 81    |
| #19                           | Vitamin M                                                                       | 11976 |
| #20                           | B9, Vitamin                                                                     | 81    |
| #21                           | #9 or #10 or #11 or #12 or #13 or #14 or #15 or #16 or #17 or #18 or #19 or #20 | 16746 |
| #22                           | #8 and #21                                                                      | 188   |

**Table S5:** Embase search strategy.

| Session Results |                                                                                                                                                                                                                                                                                                                                                                                                                                                               |                 |
|-----------------|---------------------------------------------------------------------------------------------------------------------------------------------------------------------------------------------------------------------------------------------------------------------------------------------------------------------------------------------------------------------------------------------------------------------------------------------------------------|-----------------|
| No.             | Query Results                                                                                                                                                                                                                                                                                                                                                                                                                                                 | Results Date    |
| #70.            | #9 AND #69<br>2022                                                                                                                                                                                                                                                                                                                                                                                                                                            | 839 19 Oct      |
| #69.            | #10 OR #11 OR #12 OR #13 OR #14 OR #15 OR #16 OR<br>Oct 2022<br>#17 OR #18 OR #19 OR #20 OR #21 OR #22 OR #23 OR<br>#24 OR #25 OR #26 OR #27 OR #28 OR #29 OR #30 OR<br>#31 OR #32 OR #33 OR #34 OR #35 OR #36 OR #37 OR<br>#38 OR #39 OR #40 OR #41 OR #42 OR #43 OR #44 OR<br>#45 OR #46 OR #47 OR #48 OR #49 OR #50 OR #51 OR<br>#52 OR #53 OR #54 OR #55 OR #56 OR #57 OR #58 OR<br>#59 OR #60 OR #61 OR #62 OR #63 OR #64 OR #65 OR<br>#66 OR #67 OR #68 | 83,593 19       |
| #68.            | 'vitamin m':ab,ti<br>2022                                                                                                                                                                                                                                                                                                                                                                                                                                     | 16 19 Oct       |
| #67.            | 'vitamin bc':ab,ti                                                                                                                                                                                                                                                                                                                                                                                                                                            | 22 19 Oct 2022  |
| #66.            | 'vifolin':ab,ti                                                                                                                                                                                                                                                                                                                                                                                                                                               | 1 19 Oct 2022   |
| #65.            | 'unifol (folic acid)':ab,ti                                                                                                                                                                                                                                                                                                                                                                                                                                   | 19 Oct 2022     |
| #64.            | 'speciafoldine':ab,ti                                                                                                                                                                                                                                                                                                                                                                                                                                         | 19 Oct 2022     |
| #63.            | 'sodium folate':ab,ti<br>2022                                                                                                                                                                                                                                                                                                                                                                                                                                 | 11 19 Oct       |
| #62.            | 'rubiefol':ab,ti                                                                                                                                                                                                                                                                                                                                                                                                                                              | 19 Oct 2022     |
| #61.            | 'pteroylmonoglutamic acid':ab,ti<br>2022                                                                                                                                                                                                                                                                                                                                                                                                                      | 48 19 Oct       |
| #60.            | 'pteroylmonoglutamate':ab,ti<br>2022                                                                                                                                                                                                                                                                                                                                                                                                                          | 55 19 Oct       |
| #59.            | 'pteroylglutamic acid':ab,ti                                                                                                                                                                                                                                                                                                                                                                                                                                  | 405 19 Oct 2022 |
| #58.            | 'pteroylglutamate':ab,ti<br>2022                                                                                                                                                                                                                                                                                                                                                                                                                              | 54 19 Oct       |
| #57.            | 'pteroyl monoglutamate':ab,ti<br>2022                                                                                                                                                                                                                                                                                                                                                                                                                         | 19 Oct          |
| #56.            | 'pteroyl l glutamic acid':ab,ti                                                                                                                                                                                                                                                                                                                                                                                                                               | 11 19 Oct 2022  |
| #55.            | 'pteroyl glutamate':ab,ti<br>2022                                                                                                                                                                                                                                                                                                                                                                                                                             | 12 19 Oct       |
| #54.            | 'pteroylglutamic acid tablets':ab,ti<br>2022                                                                                                                                                                                                                                                                                                                                                                                                                  | 19 Oct          |
| #53.            | 'nsc 3073':ab,ti<br>2022                                                                                                                                                                                                                                                                                                                                                                                                                                      | 19 Oct          |
| #52.            | 'neocepri':ab,ti<br>2022                                                                                                                                                                                                                                                                                                                                                                                                                                      | 19 Oct          |
| #51.            | 'n [para [ (2 amino 4 hydroxy 6 pteridylmethyl)<br>amino] benzoyl] glutamic acid':ab,ti                                                                                                                                                                                                                                                                                                                                                                       | 19 Oct 2022     |

|                                                                                                                 |        |             |
|-----------------------------------------------------------------------------------------------------------------|--------|-------------|
| #50. 'n [ [4 [ [(2 amino 4 oxo 1, 4 dihydropteridin 6 yl) methyl] amino] phenyl] carbonyl] glutamic acid':ab,ti |        | 19 Oct 2022 |
| #49. 'n [ [4 [ [(2 amino 4 oxo 1, 4 dihydro 6 pteridiny) methyl] amino] phenyl] carbonyl] glutamic acid':ab,ti  |        | 19 Oct 2022 |
| #48. 'n [4 [ [(2 amino 3, 4 dihydro 4 oxo 6 pteridiny) methyl] amino] benzoyl] glutamic acidl':ab,ti            |        | 19 Oct 2022 |
| #47. 'mission prenatal':ab,ti<br>2022                                                                           | 1      | 19 Oct      |
| #46. 'megafol':ab,ti                                                                                            | 5      | 19 Oct 2022 |
| #45. 'lexpec':ab,ti                                                                                             |        | 19 Oct 2022 |
| #44. 'lafol':ab,ti                                                                                              | 1      | 19 Oct 2022 |
| #43. 'lactobacillus casei factor':ab,ti                                                                         | 18     | 19 Oct 2022 |
| #42. 'ingafol':ab,ti                                                                                            |        | 19 Oct 2022 |
| #41. 'gravi-fol':ab,ti                                                                                          |        | 19 Oct 2022 |
| #40. 'folvite':ab,ti                                                                                            | 6      | 19 Oct 2022 |
| #39. 'folverlan':ab,ti                                                                                          |        | 19 Oct 2022 |
| #38. 'folsav':ab,ti                                                                                             | 1      | 19 Oct 2022 |
| #37. 'folsan':ab,ti                                                                                             | 7      | 19 Oct 2022 |
| #36. 'folivit':ab,ti                                                                                            |        | 19 Oct 2022 |
| #35. 'folium acid':ab,ti<br>2022                                                                                | 1      | 19 Oct      |
| #34. 'folitab':ab,ti                                                                                            |        | 19 Oct 2022 |
| #33. 'folinsyre':ab,ti<br>2022                                                                                  | 2      | 19 Oct      |
| #32. 'folina':ab,ti                                                                                             | 2      | 19 Oct 2022 |
| #31. 'folicid':ab,ti                                                                                            |        | 19 Oct 2022 |
| #30. 'folicet':ab,ti<br>2022                                                                                    |        | 19 Oct      |
| #29. 'folic acid dha':ab,ti                                                                                     | 1      | 19 Oct 2022 |
| #28. 'foliamin':ab,ti                                                                                           | 1      | 19 Oct 2022 |
| #27. 'foldine':ab,ti                                                                                            |        | 19 Oct 2022 |
| #26. 'folavit':ab,ti                                                                                            |        | 19 Oct 2022 |
| #25. 'folate sodium':ab,ti<br>2022                                                                              | 5      | 19 Oct      |
| #24. 'folate acid':ab,ti                                                                                        | 71     | 19 Oct 2022 |
| #23. 'folate':ab,ti<br>2022                                                                                     | 37,791 | 19 Oct      |
| #22. 'folart':ab,ti                                                                                             |        | 19 Oct 2022 |
| #21. 'folacin':ab,ti                                                                                            | 269    | 19 Oct 2022 |
| #20. 'folacid':ab,ti                                                                                            |        | 19 Oct 2022 |
| #19. 'filicine':ab,ti                                                                                           | 1      | 19 Oct 2022 |



|                                                                                                       |        |             |
|-------------------------------------------------------------------------------------------------------|--------|-------------|
| #18. 'apo-folic':ab,ti                                                                                |        | 19 Oct 2022 |
| #17. 'acifolic':ab,ti                                                                                 |        | 19 Oct 2022 |
| #16. 'acido folico':ab,ti                                                                             | 52     | 19 Oct 2022 |
| #15. 'acide folique ccd':ab,ti                                                                        |        | 19 Oct 2022 |
| #14. 'acfol':ab,ti                                                                                    | 7      | 19 Oct 2022 |
| #13. '2 amino 6 [ [4 [ (1, 3 dicarboxypropyl) carbamoyl] anilino] methyl] 4 pteridinol':ab,ti         |        | 19 Oct 2022 |
| #12. '2 amino 6 [ [4 [ (1, 3 dicarboxypropyl) aminocarbonyl] phenylamino] methyl] 4 pteridinol':ab,ti |        | 19 Oct 2022 |
| #11. '2 [ [4 [ (2 amino 4 oxo 3h pteridin 6 yl) methylamino] benzoyl] amino] pentanedioic acid':ab,ti |        | 19 Oct 2022 |
| #10. 'folic acid'/exp                                                                                 | 71,858 | 19 Oct 2022 |
| #9. #1 OR #2 OR #3 OR #4 OR #5 OR #6 OR #7 OR                                                         | 49,213 | 19 Oct 2022 |
| #8. 'pregnancy in diabetics':ab,ti                                                                    | 29     | 19 Oct 2022 |
| #7. 'pregnancy diabetes':ab,ti                                                                        | 460    | 19 Oct 2022 |
| #6. 'gestational diabetes mellitus':ab,ti                                                             | 15,568 | 19 Oct 2022 |
| #5. 'gestational diabetes':ab,ti                                                                      | 30,050 | 19 Oct 2022 |
| #4. 'diabetes, pregnancy':ab,ti                                                                       | 391    | 19 Oct 2022 |
| #3. 'diabetes, gestational':ab,ti                                                                     | 415    | 19 Oct 2022 |
| #2. 'diabetes mellitus gravidarum':ab,ti                                                              | 2      | 19 Oct 2022 |
| #1. 'pregnancy diabetes mellitus'/exp                                                                 | 46,239 | 19 Oct 2022 |

**Table S6:** Newcastle-Ottawa Scale (NOS) for assessing the quality of included cohort studies (n=12).

| Study                      | Selection                                |                                     |                           |                                                                                  | Comparability                                                   | Exposure              |                     |                                  | Score |
|----------------------------|------------------------------------------|-------------------------------------|---------------------------|----------------------------------------------------------------------------------|-----------------------------------------------------------------|-----------------------|---------------------|----------------------------------|-------|
|                            | Representativeness of the exposed cohort | Selection of the non-exposed cohort | Ascertainment of exposure | Demonstration that outcome of interest was not present at the start of the study | Comparability of cohorts on the basis of the design or analysis | Assessment of outcome | Length of follow up | Adequacy of follow up of cohorts |       |
| Liu et al. 2022 [30]       | 1                                        | 1                                   | 1                         | 1                                                                                | 1                                                               | 1                     | 1                   | 0                                | 7     |
| Yuan et al. 2022 [31]      | 1                                        | 1                                   | 1                         | 1                                                                                | 2                                                               | 0                     | 1                   | 1                                | 8     |
| Saravanan et al. 2021 [32] | 1                                        | 1                                   | 1                         | 1                                                                                | 2                                                               | 1                     | 1                   | 1                                | 9     |
| Chen et al. 2021 [34]      | 1                                        | 0                                   | 1                         | 1                                                                                | 2                                                               | 1                     | 1                   | 1                                | 8     |
| Liu et al. 2020 [35]       | 1                                        | 1                                   | 1                         | 1                                                                                | 1                                                               | 1                     | 1                   | 1                                | 8     |
| Xie et al. 2019 [36]       | 1                                        | 1                                   | 1                         | 1                                                                                | 2                                                               | 1                     | 1                   | 1                                | 9     |
| Tarim et al. 2004 [37]     | 1                                        | 1                                   | 1                         | 1                                                                                | 0                                                               | 1                     | 1                   | 0                                | 6     |
| Barzilay et al. 2018 [39]  | 1                                        | 1                                   | 1                         | 1                                                                                | 1                                                               | 0                     | 1                   | 0                                | 6     |





**Table S8:** Agency for Healthcare Research and Quality (AHRQ) for assessing the quality of included cross-sectional studies (n=5).

| Study                                | Define the source of information | List inclusion and exclusion criteria for exposed and unexposed subjects or refer to previous publications | Indicate time period used for identifying patients | Indicate whether or not subjects were consecutive if not population-based | Indicate if evaluators of subjective components of study were masked to other aspects of the status of the participants | Describe any assessments undertaken for quality assurance purpose | Explain any patient exclusions from analysis | Describe how confounding was assessed and/or controlled | If applicable, explain how missing data were handled in the analysis | Summarize patient response rates and completeness of data collection | Clarify what follow-up, if any, was expected and the percentage of patient for which incomplete data or follow-up was obtained | Score |
|--------------------------------------|----------------------------------|------------------------------------------------------------------------------------------------------------|----------------------------------------------------|---------------------------------------------------------------------------|-------------------------------------------------------------------------------------------------------------------------|-------------------------------------------------------------------|----------------------------------------------|---------------------------------------------------------|----------------------------------------------------------------------|----------------------------------------------------------------------|--------------------------------------------------------------------------------------------------------------------------------|-------|
| Sobczyńska-Malefora et al. 2021 [33] | 1                                | 1                                                                                                          | 1                                                  | 0                                                                         | 0                                                                                                                       | 1                                                                 | 0                                            | 1                                                       | 1                                                                    | 1                                                                    | 0                                                                                                                              | 7     |
| Guyen et al. 2006 [38]               | 1                                | 1                                                                                                          | 1                                                  | 0                                                                         | 0                                                                                                                       | 0                                                                 | 1                                            | 1                                                       | 1                                                                    | 1                                                                    | 0                                                                                                                              | 7     |
| Lai et al. 2018 [40]                 | 1                                | 1                                                                                                          | 1                                                  | 1                                                                         | 0                                                                                                                       | 1                                                                 | 0                                            | 0                                                       | 1                                                                    | 1                                                                    | 1                                                                                                                              | 8     |
| Li et al. 2019 [47]                  | 1                                | 1                                                                                                          | 1                                                  | 1                                                                         | 0                                                                                                                       | 0                                                                 | 1                                            | 1                                                       | 1                                                                    | 1                                                                    | 0                                                                                                                              | 8     |
| Seghieri et al. 2003 [43]            | 1                                | 1                                                                                                          | 1                                                  | 1                                                                         | 0                                                                                                                       | 0                                                                 | 1                                            | 1                                                       | 0                                                                    | 0                                                                    | 0                                                                                                                              | 6     |
